# Supplementary material for: ASXL2 regulates hematopoiesis in mice and its deficiency promotes myeloid expansion
Source: PubMed Central journal article supplement — Haematologica. 2018 Aug 9;103(12):1980–90. doi: 10.3324/haematol.2018.189928 (PMC6269306; doi:10.3324/haematol.2018.189928), 2018-12
Supplement: 2018.189928.MADAN_SUPPL.pdf [file 2018.189928.MADAN_SUPPL.pdf]

## **Supplementary data**

**ASXL2 regulates hematopoiesis in mice and its deficiency promotes myeloid expansion**

## **Supplementary Methods**

### **Genomic DNA extraction**

Genomic DNA was extracted from BM mononuclear cells using a DNA extraction kit (Puregene Genra System, Minneapolis, MN, USA) according to the manufacturer's instructions. Genomic DNA was quantified using Qubit Fluorometer (Life Technologies) and DNA integrity was assessed by agarose gel electrophoresis. For samples with low quantity, DNA was amplified using REPLI-g Ultrafast mini kit (Qiagen).

### **Peripheral blood analysis**

Complete peripheral blood counts were analysed using Abbott Cell-Dyn 3700 hematology analyzer (Abbott Laboratories).

### **Expression analysis of Asxl2 and Asxl1**

Transcript levels of Asxl2 and Asxl1 were estimated using quantitative RT-PCR with following primers: Asxl2 primer set 1, ATTCGACAAGAGATTGAGAAGGAG (forward) and TTTCTGTGAATCTTCAAGGCTTAG (reverse); Asxl2 primer set 2, GCCCTTAACAATGAGTTCTTCACT (forward) and TCCACAGCTCTACTTTCTTCTCCT (reverse); Asxl1 primers, GGTGGAACAATGGAAGGAAA (forward) and CTGGCCGAGAACGTTTCTTA (reverse). Asxl2 protein was detected in immunoblot using anti-ASXL2 antibody (Bethyl).

### ***In vitro* differentiation of bone marrow cells**

Bone marrow (BM) cells were cultured in IMDM containing 20% FBS and 10 ng/ml IL3, 10 ng/ml IL6, 20 ng/ml SCF and 20 ng/ml GM-CSF for two weeks. For FACS analysis, cells were washed, stained with fluorochrome-conjugated antibodies and analysed on FACS LSR II flow cytometer (BD Biosciences) using FACSDIVA software (BD Biosciences).

### **Colony re-plating assay**

Bone marrow cells were plated in methylcellulose medium containing mouse stem cell factor (SCF), mouse interleukin 3 (IL-3), human interleukin 6 (IL-6) and human erythropoietin (MethoCult GF M3434; StemCell Technologies). Colonies were enumerated after 9-12 days and cells were harvested for re-plating.

### **BrdU incorporation assay**

Mice were injected intraperitoneally with bromodeoxyuridine (BrdU) (1 mg BrdU/mouse) and euthanized 2 hours later. Bone marrow cells were harvested from femurs and tibias, Lin<sup>-</sup> cells were enriched using Dynabeads Sheep anti-rat IgG and stained with fluorochrome-conjugated antibodies. Cells were then fixed and permeabilized using APC BrdU Flow Kit (BD Biosciences) as per the manufacturer's instruction and stained with anti-BrdU antibody and Hoechst 33342 dye (1 µg/ml). Samples were acquired on LSRII flow cytometer (BD Biosciences) and data were analysed using FACSDIVA software (BD Biosciences).

### **Myeloperoxidase staining**

Spleens were fixed with 10% formalin for 24 hours and embedded in paraffin. Four µm thick sections were cut, paraffin was removed using xylene and sections were rehydrated with ethanol. Endogenous peroxidase activity was blocked with 3% hydrogen peroxide in methanol for 10 min. Heat-induced antigen retrieval was performed in 0.01M Citrate buffer, pH 6.0 at 95°C for 25 min. The slides were then stained with rabbit polyclonal Myeloperoxidase (Agilent, A039829-2) for 45 min at room temperature. The signal was detected using Dako EnVision+ System (Agilent, K4003). All sections were visualized with the diaminobenzidine reaction and counterstained with hematoxylin.

### **Competitive and non-competitive reconstitution assay**

For competitive repopulation assay, Lin<sup>-</sup>Kit<sup>+</sup>Sca1<sup>+</sup> (LSK) cells sorted from the *Asx2* KO or WT mice (expressing CD45.2) were mixed with LSK cells from the competitor B6.SJL-Ptprca Pepcb/BoyJ (B6.SJL) strain (expressing CD45.1). 2,000 or 4,000 total LSK cells were injected in the tail vein of lethally irradiated (11 Gy) recipient mice (B6.SJL x 129 F1) (expressing both CD45.1 and CD45.2). Recipient mice also received 500,000 spleen cells harvested from non-irradiated mice (B6.SJL x 129 F1). Following transplantation, peripheral blood was collected from the facial vein every four weeks, red cells were lysed using ACK solution, and leukocytes were stained with antibodies against CD45.1, CD45.2 and the lymphoid (CD3 and CD19) and myeloid (CD11b, Gr1 and F4/80) cells. Donor contribution to different lineages was analyzed on FACS LSR II using FACSDIVA software (BD Biosciences). For non-competitive reconstitution assay, two million bone marrow cells from either WT or *Asx2* KO mice were injected intravenously in lethally irradiated mice. Engraftment was assessed after 4 weeks, mice were euthanized one year after transplantation, and lymphoid organs were analyzed using flow cytometry.

### **Flow cytometry**

Single cell suspensions from bone marrow, spleen and thymus were incubated with fluorochrome-conjugated antibodies for 30 min on ice. Cells were washed with 2% FBS/PBS and resuspended in SYTOX Blue Dead Cell Stain (ThermoFisher Scientific) (1:10,000 dilution in 2% FBS/PBS). Cells were acquired on FACS LSR II flow cytometer (BD Biosciences) and data were analyzed using FACSDIVA software (BD Biosciences). Sorting of cells was performed on FACS Aria cell sorter (BD Biosciences). See Supplementary Table S2 for the list of antibodies used for flow cytometric staining.

## RNA sequencing and expression analysis

RNA was extracted from FACS-sorted LSK cells from *Asx1/2* KO and WT littermates using Qiagen RNeasy Micro Kit. cDNA libraries were prepared from poly-A selected RNA using SMART-Seq v4 Ultra Low Input RNA Kit (Clontech Laboratories; Mountain View, CA, USA). For BM cells expressing mutant or wild-type ASXL2, RNA was extracted using Qiagen RNeasy Mini Kit and libraries prepared using TruSeq sample preparation kit (Illumina). Libraries were sequenced on HiSeq 4000 and 100 bp paired-end reads were aligned to mouse reference transcriptome (GRCm38/mm10; Ensemble version 84) using Kallisto (version 0.43.0).<sup>1</sup> Transcript level fragment counts were summarized to gene level using TxImport Bioconductor package and differential analysis was performed using DESeq2.<sup>2, 3</sup> Gene expression was quantified in FPKM units using DESeq2 fpkm command and was used for all downstream analysis and plotting. All other test-statistics and plotting were performed using R 3.4.0. Gene Ontology (GO) was performed on differentially expressed genes using goseq Bioconductor package (version 1.20.0), which accounts for bias due to gene length.<sup>2</sup> Resulting p-values were adjusted for False Discovery Rate (FDR). For GSEA analysis we used all “active transcripts” with mean expression of 0.5 FPKM to identify significantly enriched gene sets among MSigDB C2 gene sets.<sup>4</sup> Genes were rank ordered according to their fold change between WT and KO mice, as determined by mean number of RNA-Seq reads across two replicates per condition.

## Supplementary References

1. Bray NL, Pimentel H, Melsted P, Pachter L. Near-optimal probabilistic RNA-seq quantification. *Nat Biotechnol.* 2016;34(5):525-527.
2. Sonesson C, Love MI, Robinson MD. Differential analyses for RNA-seq: transcript-level estimates improve gene-level inferences. *F1000Res.* 2015;4(1521).

3. Love MI, Huber W, Anders S. Moderated estimation of fold change and dispersion for RNA-seq data with DESeq2. *Genome Biol.* 2014;15(12):550.
4. Subramanian A, Tamayo P, Mootha VK, et al. Gene set enrichment analysis: a knowledge-based approach for interpreting genome-wide expression profiles. *Proc Natl Acad Sci U S A.* 2005;102(43):15545-15550.

## Supplementary Figure S1

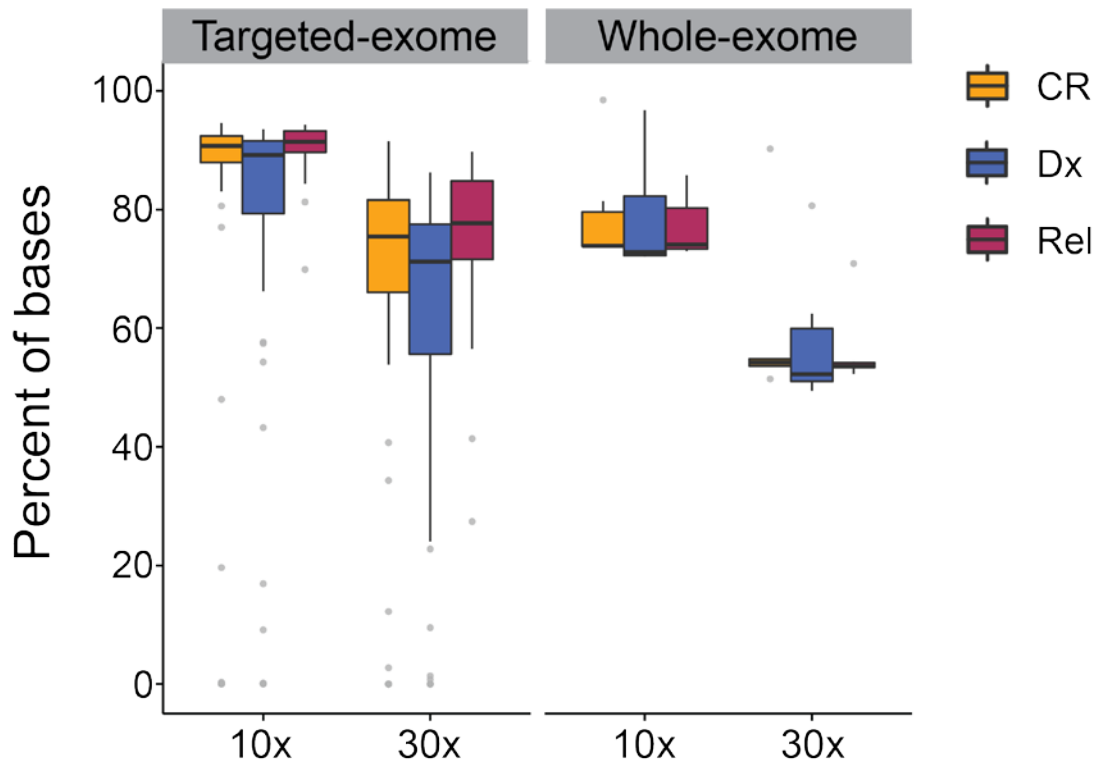

**Supplementary Figure S1:** Sequencing coverage of t(8;21) AML samples analysed by whole exome and targeted exome sequencing. Box plots show proportion of bases covered at 10x and 30x sequencing depth for diagnosis (Dx), relapse (Rel) and complete remission (CR) samples.

## Supplementary Figure S2

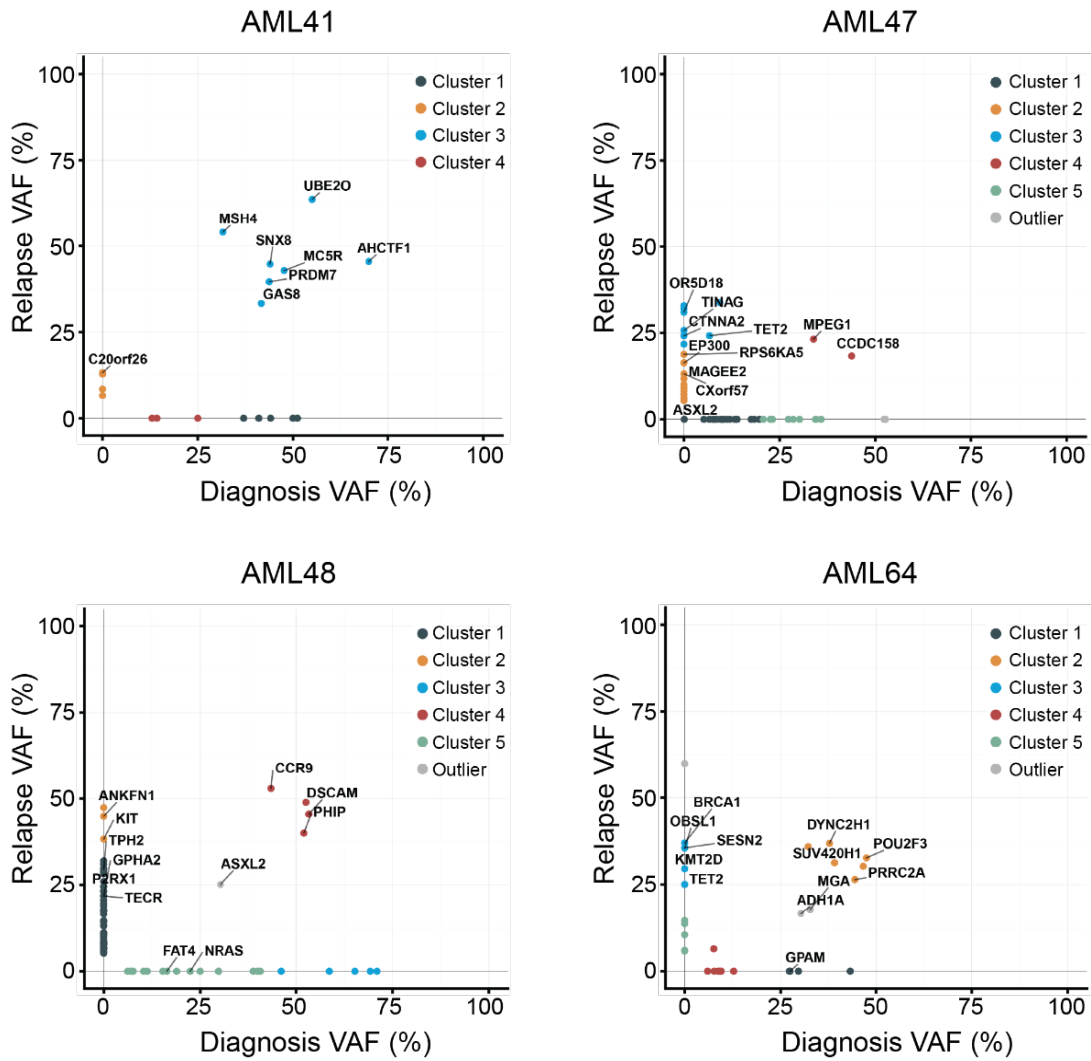

**Supplementary Figure S2:** Representative plots depict variant allele frequencies (VAF) of somatic mutations identified at diagnosis and relapse in four t(8;21) AML cases analysed using whole exome sequencing.



## Supplementary Figure S3

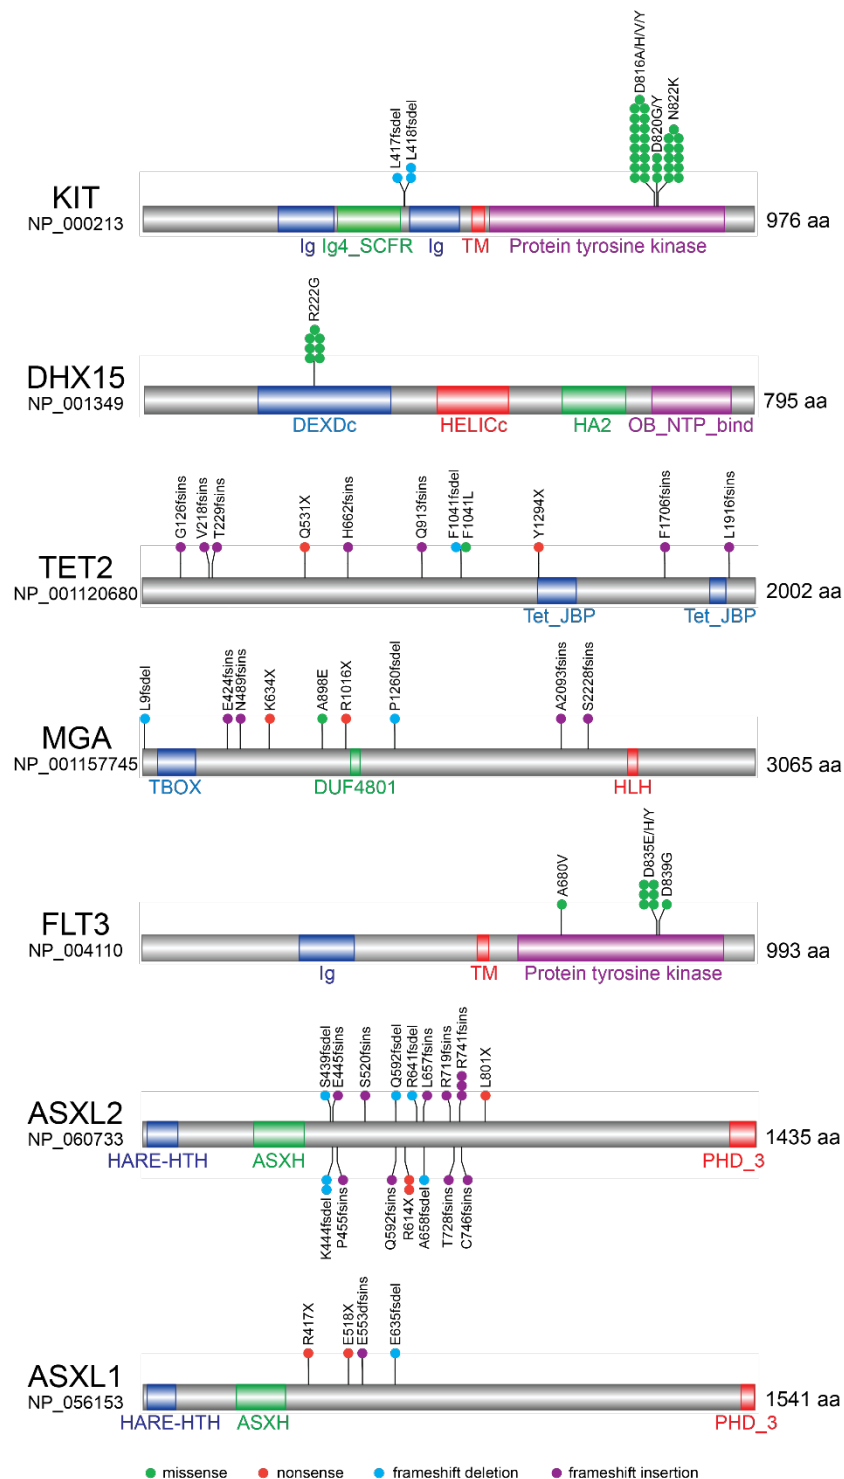

**Supplementary Figure S3:** Schematic representation of protein domains of frequently mutated genes in our t(8;21) AML cohort are shown along with location and type of somatic mutations. Illustrations were prepared with IBS software using the motif information from NCBI Protein database (<http://www.ncbi.nlm.nih.gov/protein>). Circles depicting individual mutations are color coded for different types of mutations. For matched primary and relapse samples, mutations that are detected at both stages

are depicted only once. Ig: Immunoglobulin domain, Ig4\_SCFR: Fourth immunoglobulin (Ig)-like domain of stem cell factor receptor, TM: transmembrane region, DEXDc: DEAD-like helicases superfamily, HELICc: helicase superfamily c-terminal domain, HA2=Helicase associated domain, OB\_NTP\_bind: Oligonucleotide/oligosaccharide-binding (OB)-fold, Tet\_JBP: Oxygenase domain of the 2OGFeDO superfamily, TBOX: T-box DNA binding domain of the T-box family of transcriptional regulators, DUF4801: Domain of unknown function, HLH: Helix-loop-helix DNA-binding domain, HARE-HTH: HB1, ASXL, restriction endonuclease HTH domain, ASXH: Asx homology domain and PHD\_3: PHD domain of transcriptional enhancer, Asx.

## Supplementary Figure S4

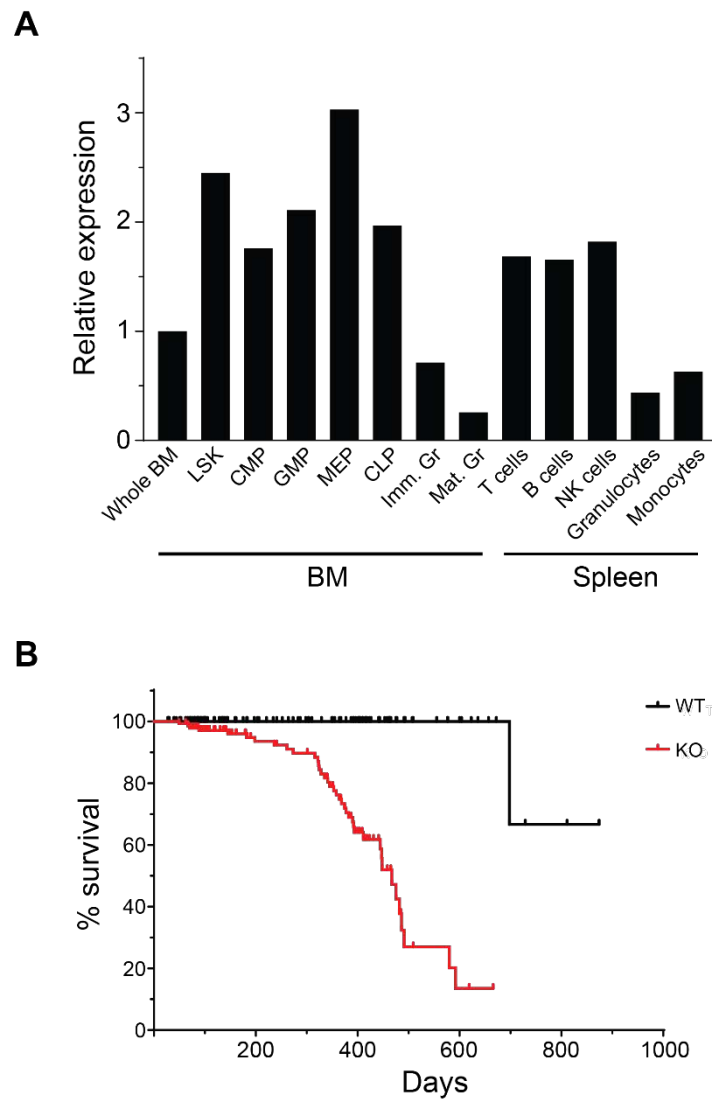

**Supplementary Figure S4:** (A) *Asx2* transcript levels in different hematopoietic cells sorted from either bone marrow or spleen of C57BL/6 mice. Imm. Gr: Immature granulocytes (CD11b<sup>+</sup>Gr1<sup>inter</sup>), Mat. Gr: Mature granulocytes (CD11b<sup>+</sup>Gr1<sup>hi</sup>). (B) Kaplan Meier curve depicts the survival duration of WT (n=207) and *Asx2* KO (n=145) mice ( $p < 0.0001$ , Log-rank (Mantel-Cox) test).

## Supplementary Figure S5

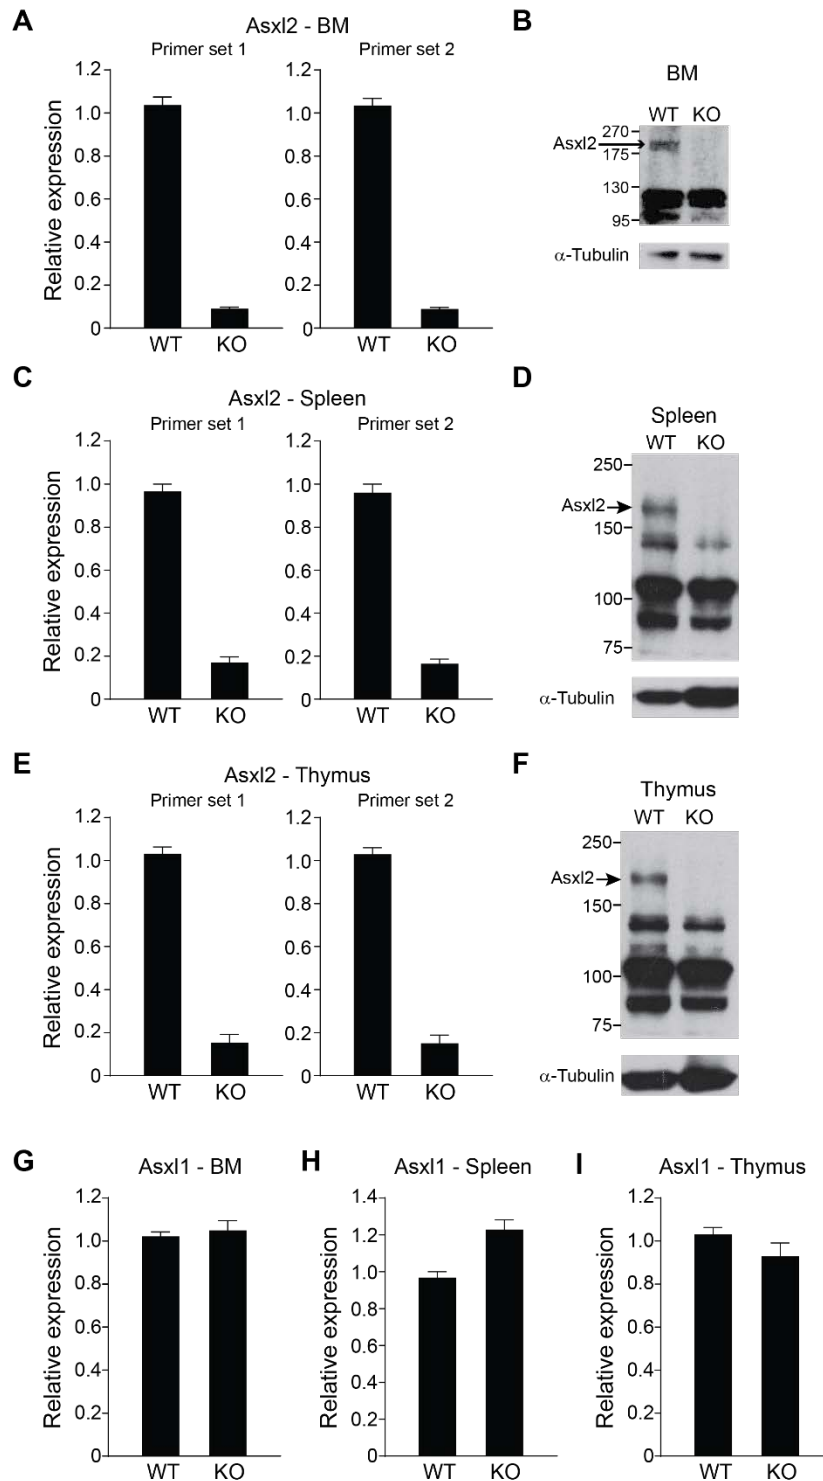

**Supplementary Figure S5:** (A-F) Significantly reduced transcript and protein levels of *Asx2* in the bone marrow (BM) (A-B), spleen (C-D) and thymus (E-F) of *Asx2* gene-trap (KO) mice compared with the WT mice. (G-I) Transcript levels of *Asx1* in bone marrow (G), spleen (H) and thymus (I) of WT and *Asx2* gene-trap (KO) mice. Bars represent mean  $\pm$  SEM.

## Supplementary Figure S6

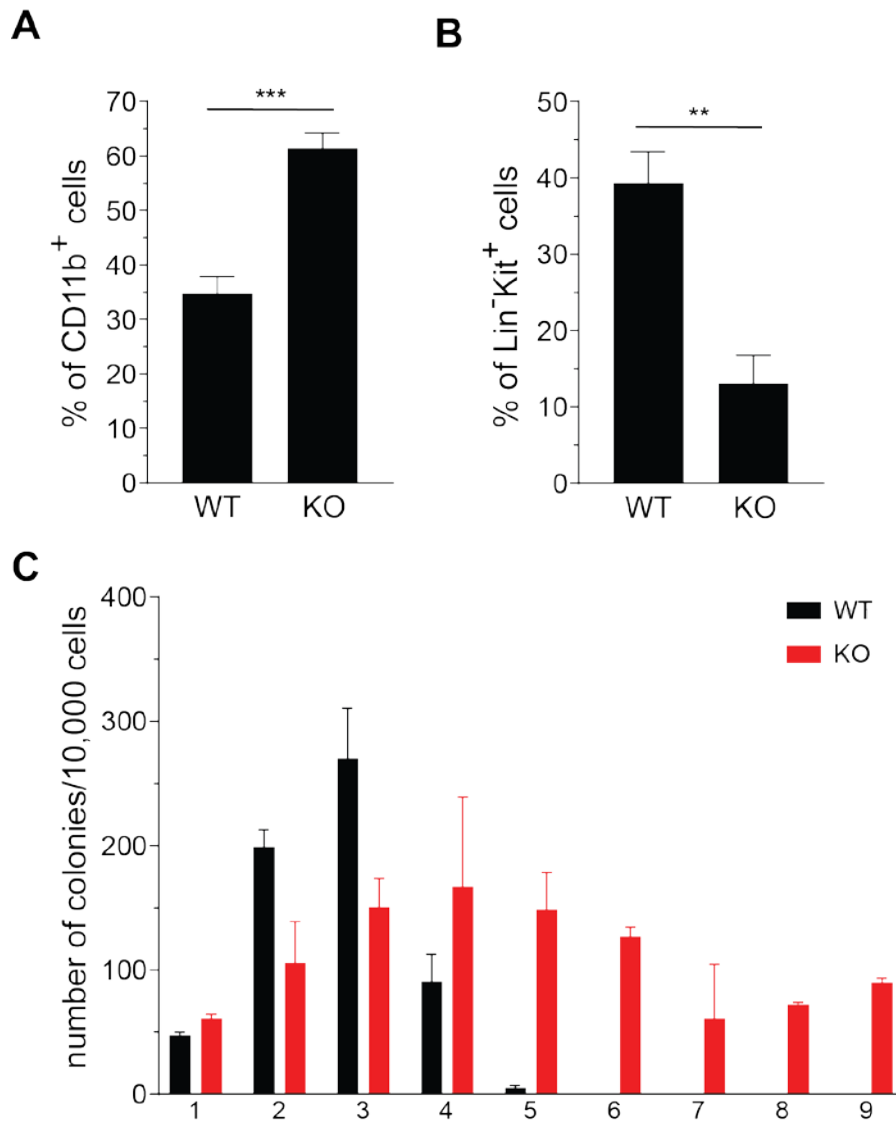

**Supplementary Figure S6:** (A-B) Proportion of CD11b<sup>+</sup> (A) and Lin<sup>-</sup>Kit<sup>+</sup> cells (B) identified using flow cytometry in *in vitro* differentiation of *Asx2* WT and KO BM cells. Cells were cultured in the presence of IL3, IL6, SCF and GMCSF for two weeks (n=8 for WT; n=4 for KO). (C) Colony re-plating assay using *Asx2* WT and KO BM cells. Cells were plated in duplicate and colonies were enumerated after 9-12 days (n=5 for WT; n=3 for KO). Data are represented as mean ± SEM. \*\* p<0.01, \*\*\* p<0.001.

## Supplementary Figure S7

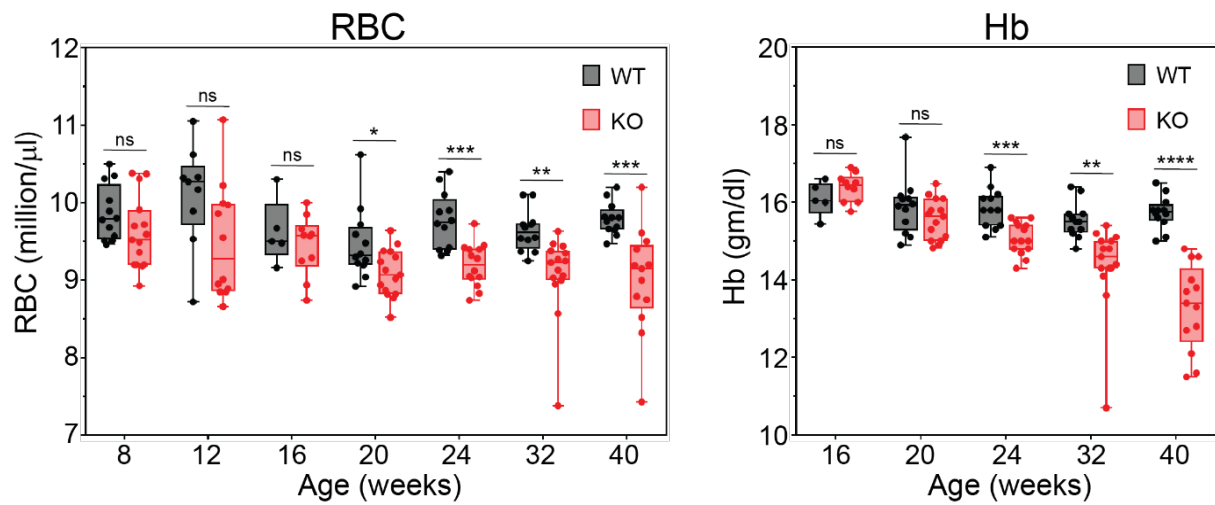

**Supplementary Figure S7:** Periodic analysis of RBC counts and hemoglobin (Hb) levels in peripheral blood of WT and *Asx12* deficient mice. Whiskers extend from the smallest to the largest values. \* $p < 0.05$ , \*\* $p < 0.01$ , \*\*\* $p < 0.001$ , \*\*\*\* $p < 0.0001$ , ns = not significant.

## Supplementary Figure S8

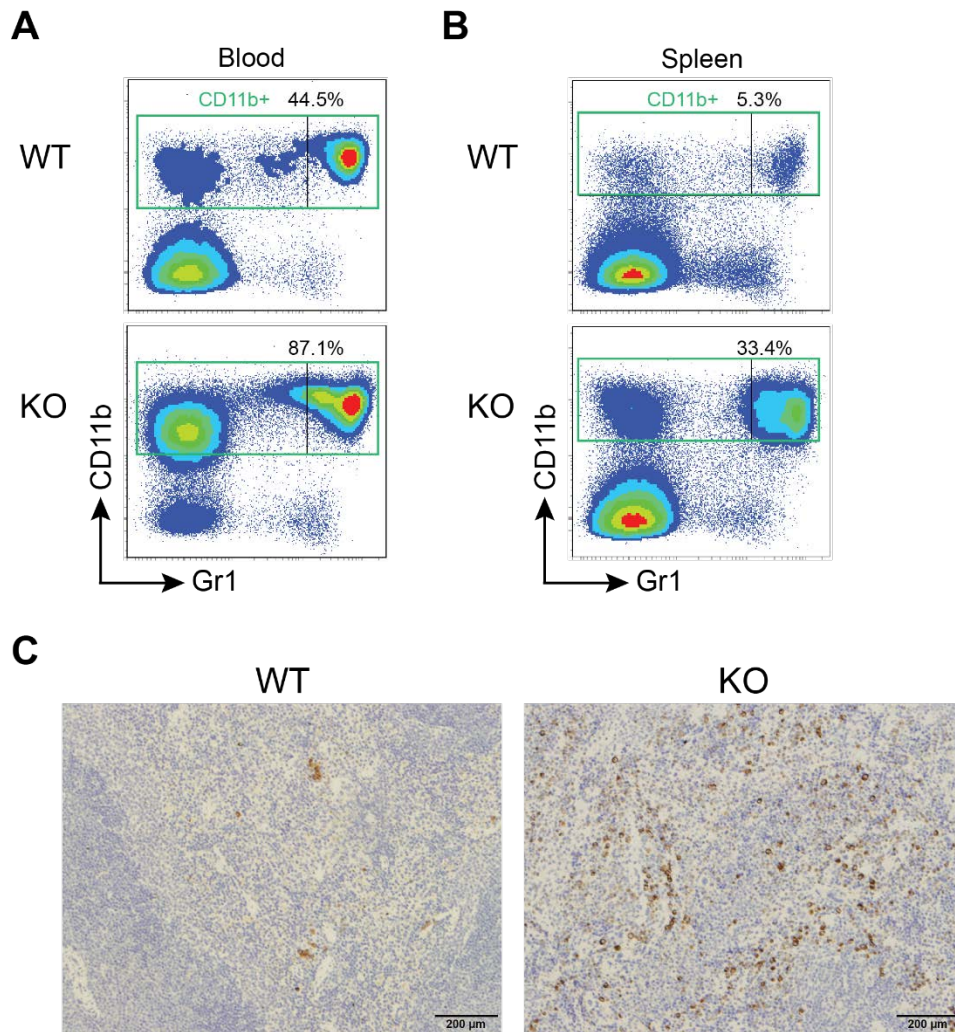

**Supplementary Figure S8:** (A-B) Representative FACS plots depict proportion of mature myeloid cells in the peripheral blood (A) and spleen (B) of >1-year old WT and *Asx2* KO mice. (C) Representative photographs of immunohistochemical staining for myeloperoxidase in sections of spleens from >1-year old WT and *Asx2* KO mice (10x objective using Olympus IX71 microscope).

## Supplementary Figure S9

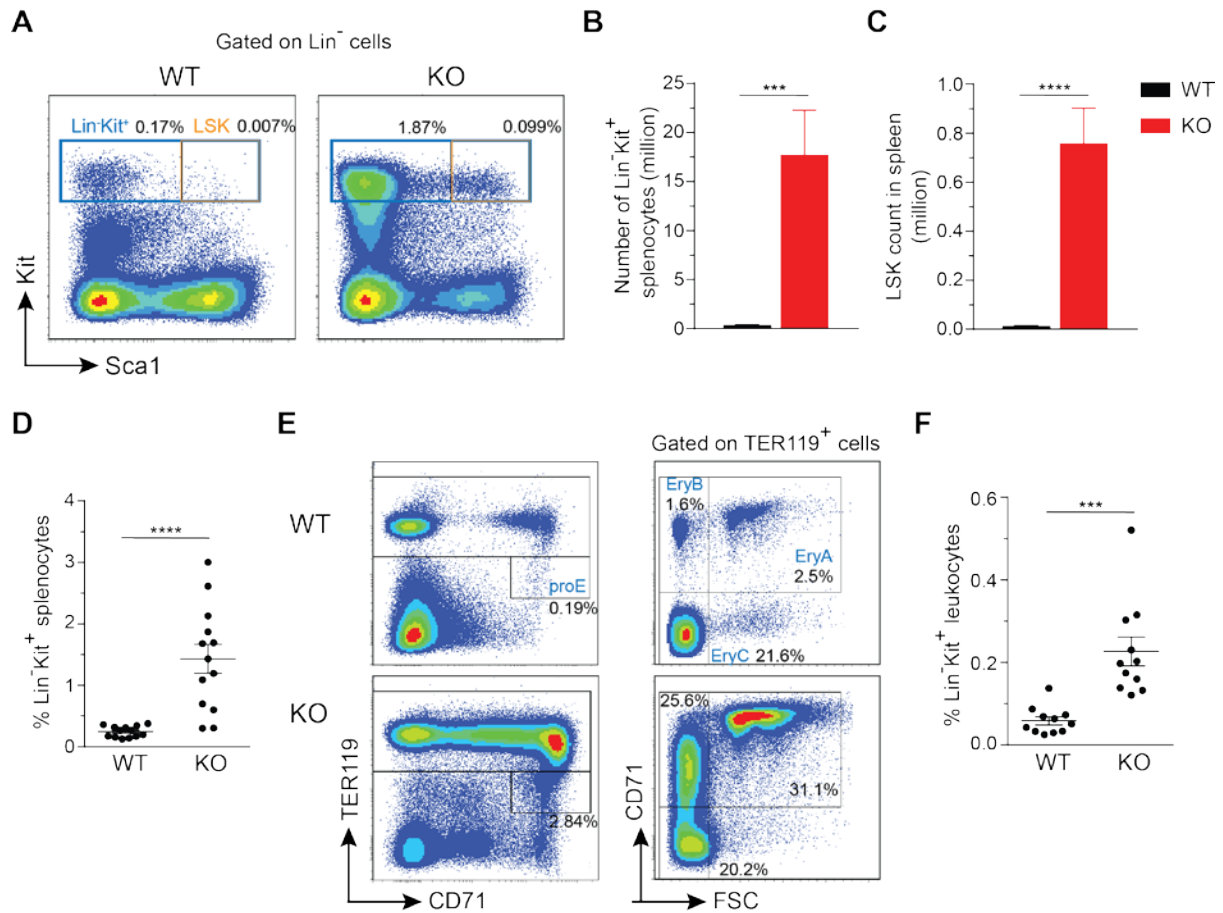

**Supplementary Figure S9:** (A) Density plots depict representative staining for LSK and total Lin<sup>-</sup>Kit<sup>+</sup> populations in spleens of >1-year old WT and *Asx1/2* KO mice. (B-C) Absolute numbers of Lin<sup>-</sup>Kit<sup>+</sup> (B) and LSK (C) cells in the spleen of old WT and *Asx1/2* KO mice (n=13). (D) Proportion of Lin<sup>-</sup>Kit<sup>+</sup> cells in the spleen of old WT and *Asx1/2* KO mice. (E) Representative FACS plots show successive stages of erythroid cell maturation (proE → EryA → EryB → EryC) using antibodies against CD71 and TER119 in the spleen of >1-year old mice. (F) Percentage of Lin<sup>-</sup>Kit<sup>+</sup> cells in nucleated peripheral blood cells of >1-year old WT and *Asx1/2* KO mice are depicted. Data are represented as mean ± SEM. \*\*\*p<0.001, \*\*\*\*p<0.0001.



## Supplementary Figure S10

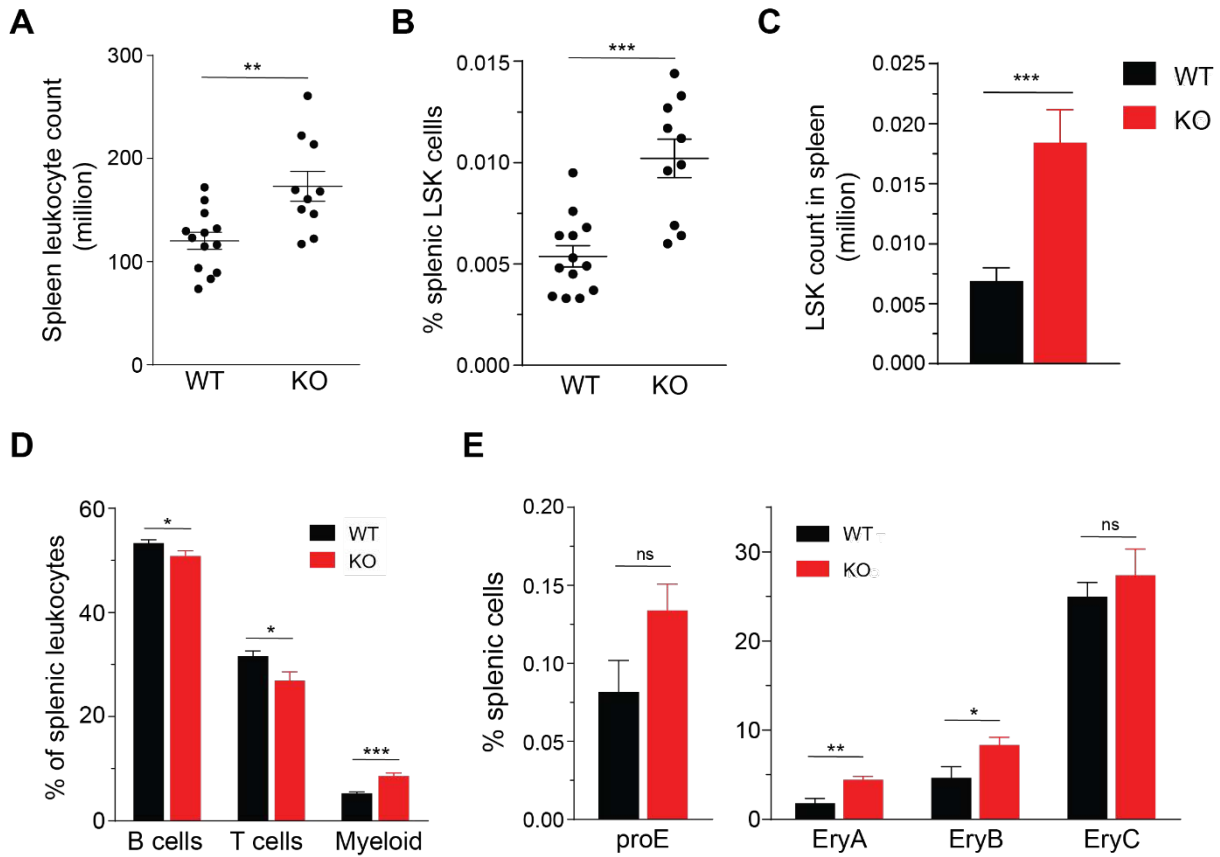

**Supplementary Figure S10:** (A) Spleen cellularity in 8-14 weeks old WT and *Asx2* KO mice. (B-C) Proportion (B) and absolute number (C) of LSK cells in the spleen of young (8-14 weeks old) WT and *Asx2* KO mice (n=13 for WT; n=10 for KO). (D) Percentages of B (CD19<sup>+</sup>), T (CD3<sup>+</sup>) and myeloid (CD11b<sup>+</sup>) cells in the spleen of young (8-14 weeks old) WT and *Asx2* KO mice (n=10-14 for WT; n=7-11 for KO). (E) Frequency of erythroid precursors in the spleen of young mice as determined by flow cytometric analysis using anti-CD71 and anti-TER119 antibodies (n=8). Data are represented as mean ± SEM. \*p < 0.05, \*\*p < 0.01, \*\*\*p < 0.001, ns = not significant.

## Supplementary Figure S11

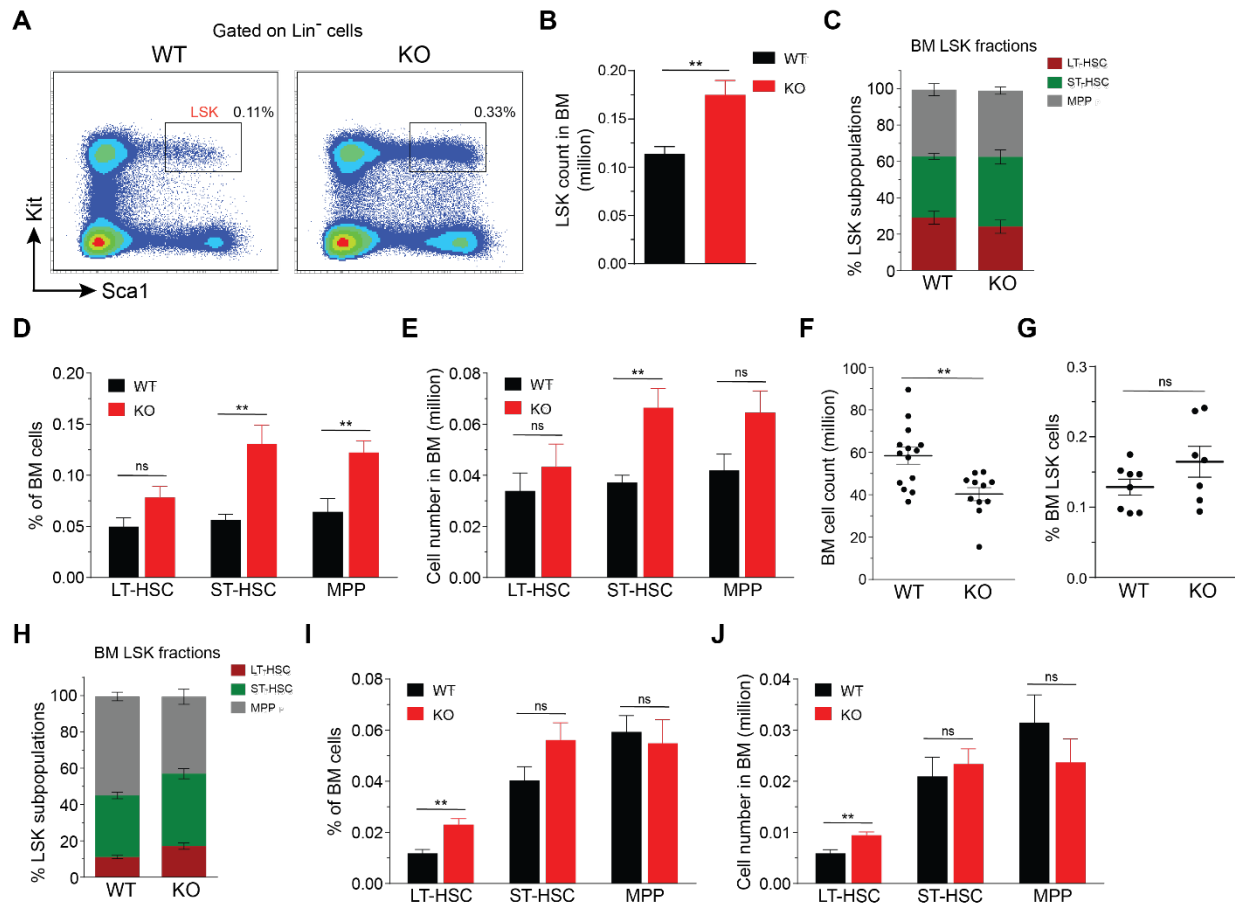

**Supplementary Figure S11:** (A) Representative FACS plots depict LSK population in >1-year old WT and *Asx1/2* KO mice. (B) Absolute number of LSK cells in the bone marrow (two femurs + two tibias) of old mice (n=14). (C) Relative proportions of long term HSCs (LT-HSCs) (CD34<sup>+</sup>Flt3<sup>-</sup>LSK), short-term HSCs (ST-HSCs) (CD34<sup>+</sup>Flt3<sup>-</sup>LSK) and multipotent progenitors (MPPs) (CD34<sup>+</sup>Flt3<sup>+</sup>LSK) subpopulations within the LSK compartment in the BM of the old mice. (D) Frequencies of LT-HSCs, ST-HSCs and MPPs in the BM of >1-year old WT and KO mice. (E) Absolute numbers of LT-HSCs, ST-HSCs and MPPs in the BM of >1-year old WT and KO mice. (F) Bone marrow cellularity (two femurs + two tibias) in 8-14 weeks old WT and *Asx1/2* KO mice. (G) Frequency of LSK cells in the bone marrow of young mice. (H) Relative proportions of LT-HSCs, ST-HSCs and MPPs subpopulations within the LSK compartment in the BM of the young mice. (I) Frequencies of LT-HSCs, ST-HSCs and MPPs in the BM of 8-14 weeks old WT and KO mice. (J) Absolute numbers of LT-HSCs, ST-HSCs and MPPs in the BM of young WT and KO mice. Data are represented as mean ± SEM. \*\* p<0.01, ns = not significant.

## Supplementary Figure S12

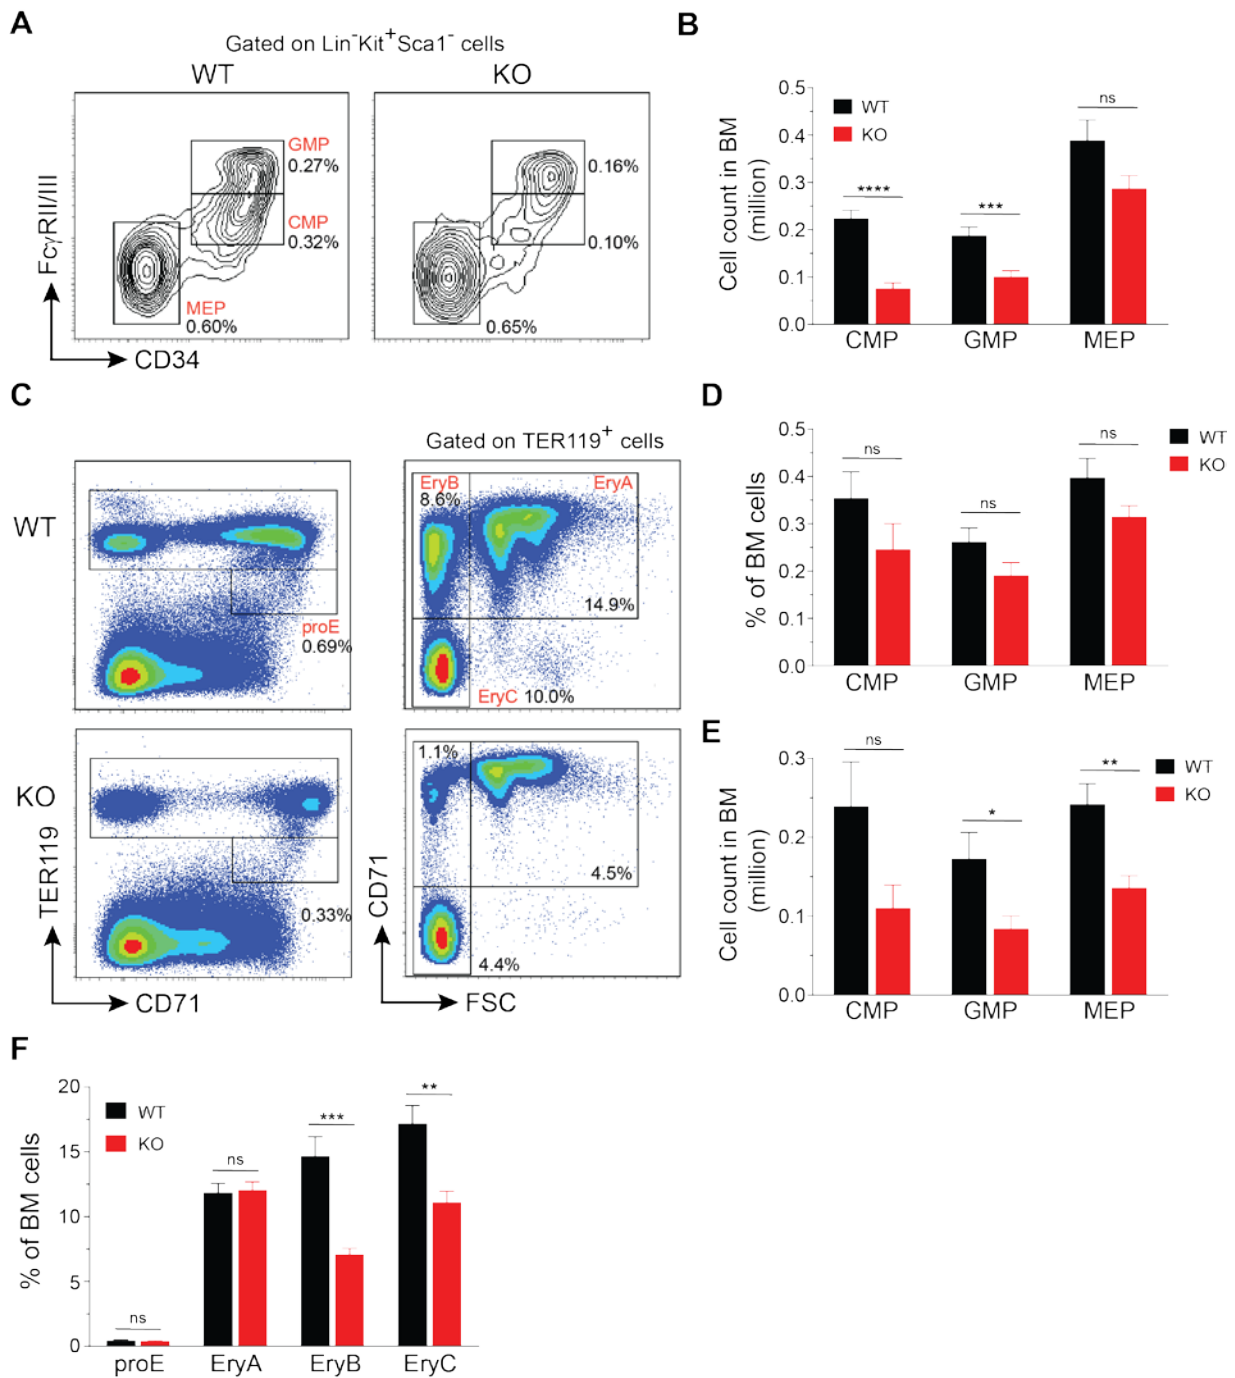

**Supplementary Figure S12:** (A) Representative contour plots depict flow cytometric staining for erythro-myeloid progenitors in the BM. Percentage of CMP, GMP and MEP cells in the bone marrow of old WT and KO mice are indicated. (B) Absolute cell counts for CMP, GMP and MEP populations in the bone marrow (two femurs + two tibias) of >1-year old mice (n=12). (C) Representative flow cytometry analysis for erythroid progenitors in the BM of >1-year old WT and KO mice. (D-E) Percentages (D) and absolute numbers (E) of CMP, GMP and MEP cells in the BM of 8-14 weeks old WT and *Asx2* KO mice (n=7 for WT; n=6 for KO). (F) Frequency of cells in advancing

stages of erythroid differentiation in the BM of 8-14 weeks old WT and *Asx1/2* KO mice (n=8 for WT; n=7 for KO). Bars represent mean  $\pm$  SEM. \*p <0.05, \*\*p<0.01, \*\*\*p<0.001, \*\*\*\*p<0.0001, ns = not significant.

## Supplementary Figure S13

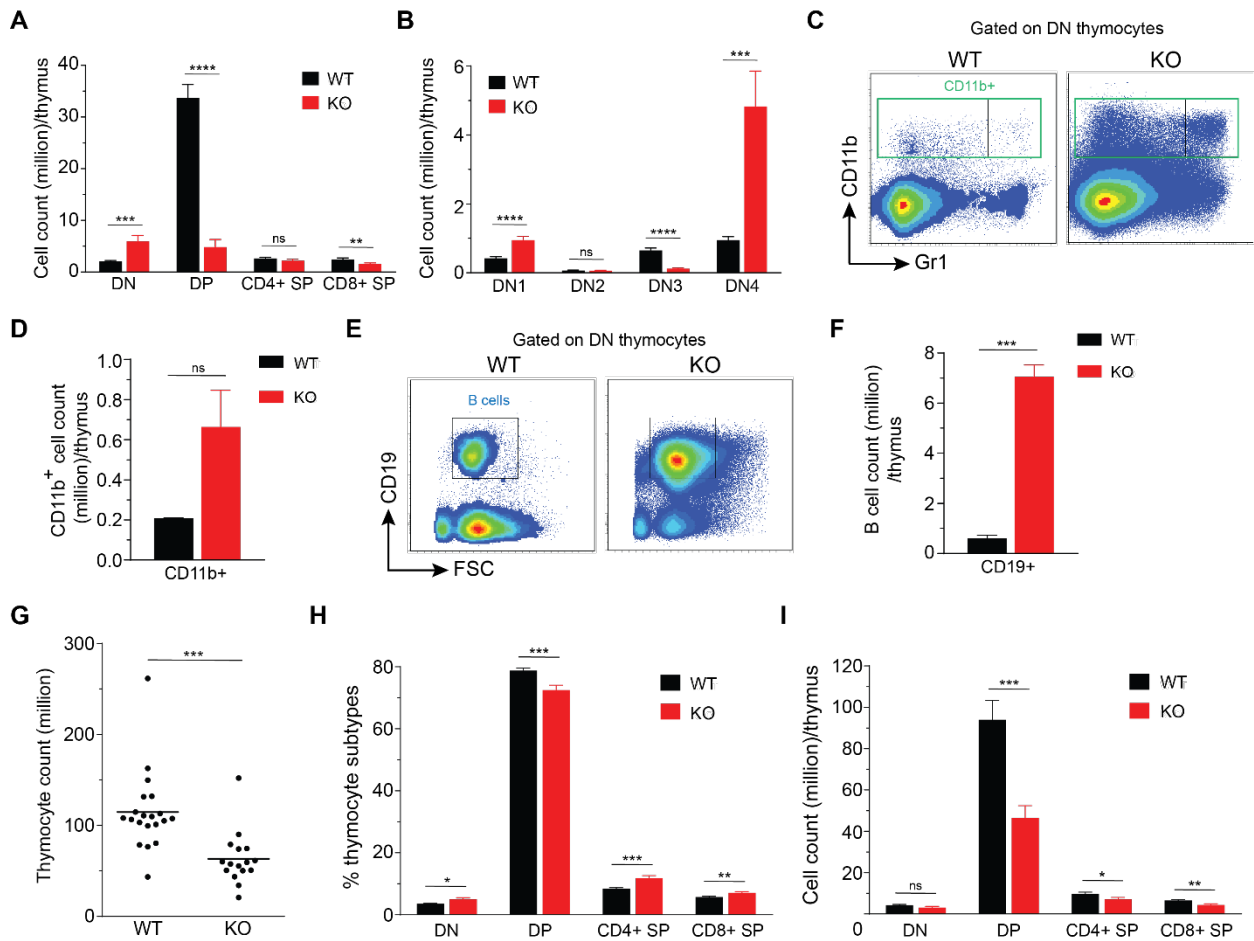

**Supplementary Figure S13:** (A) Absolute numbers of cells in the double negative (DN) (CD4<sup>-</sup>CD8<sup>-</sup>), double positive (DP) (CD4<sup>+</sup>CD8<sup>+</sup>), CD4<sup>+</sup> SP and CD8<sup>+</sup> SP compartments in the thymus of old WT and *Asx2* KO mice are depicted (n=14 each). (B) Absolute number of cells in DN1, DN2, DN3 and DN4 compartment in the thymus of >1-year old WT and KO mice. (C) Density plots depict representative staining with anti-CD11b and anti-Gr1 antibodies within the DN compartment of >1-year old WT and KO mice. (D) Bars represent number of CD11b<sup>+</sup> cells in the thymus of old WT and KO mice. (E) Representative FACS plots for CD19<sup>+</sup> cells within the DN compartment of old WT and KO mice are shown. (F) Absolute number of B cells in the thymus of old WT and *Asx2* KO mice (n=3). (G) Thymus cellularity of young (8-14 weeks old) WT and *Asx2* KO mice. (H-I) Frequency (H) and absolute number (I) of cells in DP, DN, CD4<sup>+</sup> SP and CD8<sup>+</sup> SP compartments in young WT and KO mice (n=17 (WT); n=15 (KO)). Data are represented as mean ± SEM. \*p < 0.05, \*\*p < 0.01, \*\*\*p < 0.001, \*\*\*\*p < 0.0001, ns = not significant.

## Supplementary Figure S14

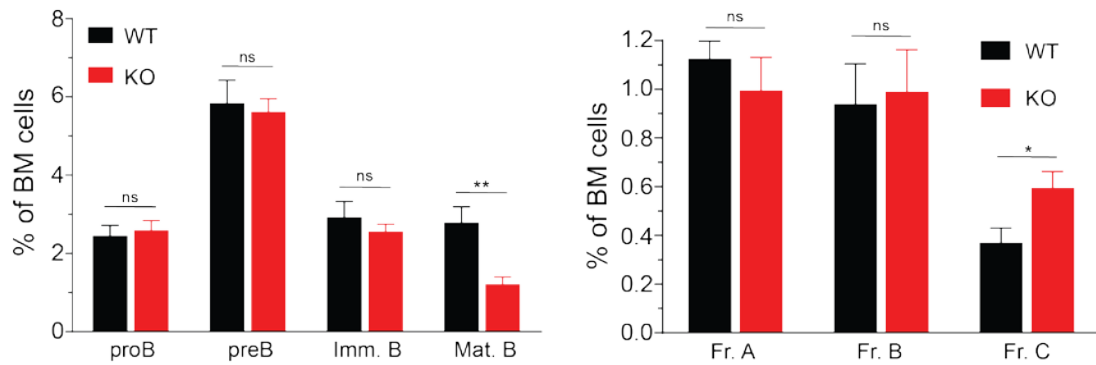

**Supplementary Figure S14:** Frequencies of B cell precursors in the bone marrow of young WT and *Asx/2* KO mice. proB: CD43<sup>+</sup>B220<sup>+</sup>, preB: CD43<sup>-</sup>B220<sup>+</sup>IgM<sup>-</sup>, immature B (Imm. B): CD43<sup>-</sup>B220<sup>+</sup>IgM<sup>+</sup>, mature B (Mat. B): CD43<sup>-</sup>B220<sup>hi</sup>IgM<sup>+</sup>, Fraction A (Fr. A): CD24<sup>-</sup>BP1<sup>-</sup> proB cells, Fraction B (Fr. B): CD24<sup>+</sup>BP1<sup>-</sup> proB cells, Fraction C (Fr. C): CD24<sup>+</sup>BP1<sup>+</sup> proB cells. Results are depicted as mean  $\pm$  SEM. \* $p < 0.05$ , \*\*  $p < 0.01$ , ns = not significant.

## Supplementary Figure S15

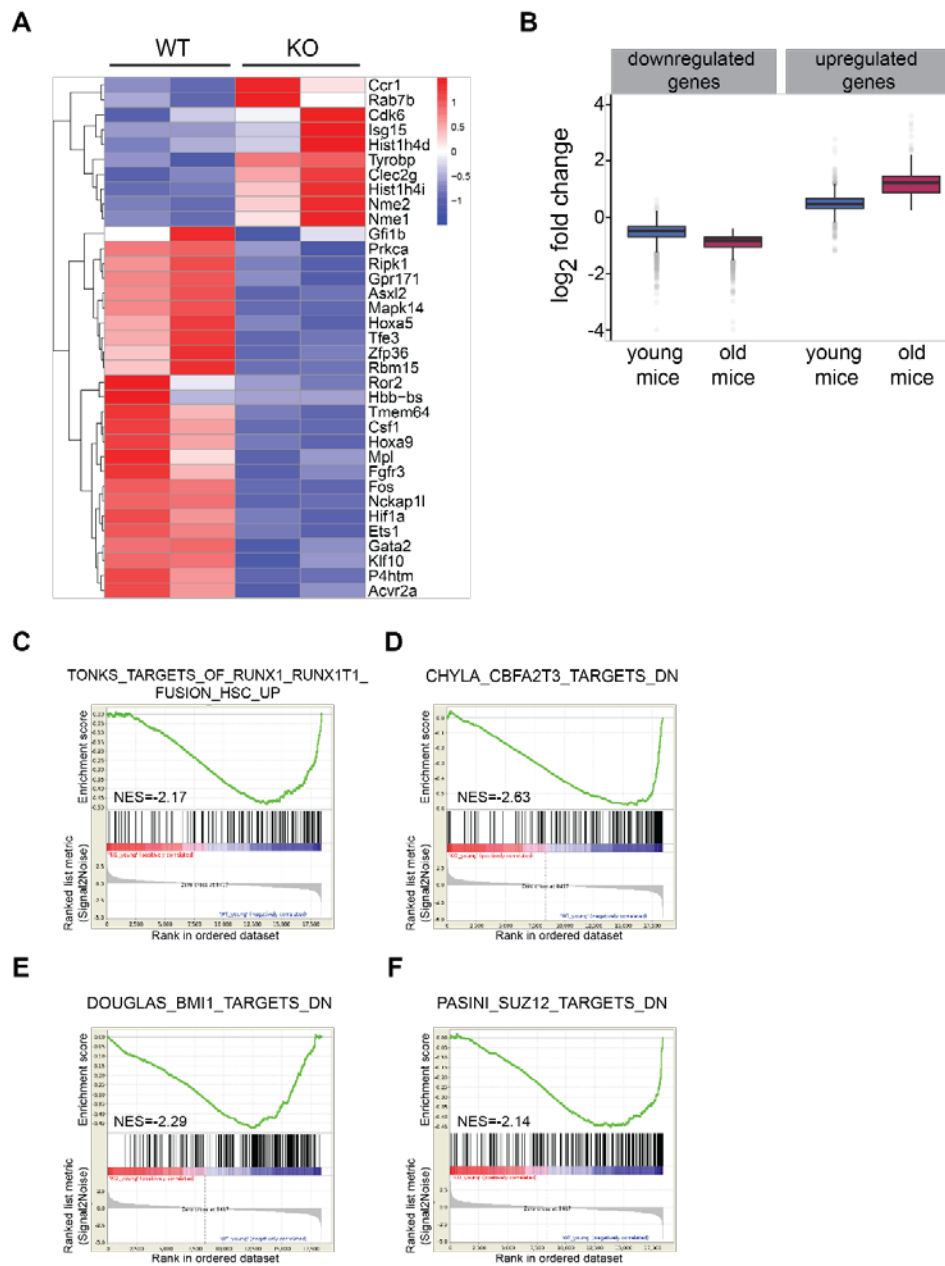

**Supplementary Figure S15:** (A) Heat map shows levels of differentially expressed genes (FDR<0.1) from Gene Ontology biological process 'regulation of myeloid cell differentiation genes' (GO:0045637) in the LSK cells from >1-year old *Asx2* KO mice compared with the LSK cells from the old WT mice. (B) Box plots depict relative expression in LSK cells from young and old mice for genes either significantly downregulated or upregulated (FDR<0.1) in LSK cells from old mice. (C-D) GSEA plots of selected gene sets enriched in the LSK cells from young control and *Asx2* KO littermates (corresponding to the plots in Figure 7D-E for the old mice). (E-F) GSEA plots for genes down-regulated in Ewing's sarcoma cell line upon knockdown of BMI1 (E), and genes down-regulated in SUZ12 deficient ES cells (F), in LSK cells from WT and KO littermates.

## **Supplementary Tables S1-S6**

**Supplementary Table S1:** Genes analysed by targeted capture approach in frequency cohort of t(8;21) AML

**Supplementary Table S2:** Antibodies used for flow cytometric analysis

**Supplementary Table S3:** Clinical information for t(8;21) AML samples used for whole exome and targeted exome sequencing

**Supplementary Table S4:** Somatic mutations validated in whole exome sequencing of ten paired newly diagnosed and relapsed t(8;21) AML samples

**Supplementary Table S5:** Driver mutations identified in discovery and validation cohorts of t(8;21) AML

**Supplementary Table S6:** Differentially expressed genes in Asxl2 deficient LSK cells (old and young mice)

*Separate excel files for Supplementary Tables S3-S6*



**Supplementary Table S1:** Genes analysed by targeted capture approach in frequency cohort of t(8;21) AML

|           |           |          |         |          |         |         |         |           |          |
|-----------|-----------|----------|---------|----------|---------|---------|---------|-----------|----------|
| ABCA12    | BRIP1     | DAAM2    | FBLN2   | HYDIN    | LTK     | NOTCH3  | PRAM1   | SEMA6D    | TINAG    |
| ABL1      | BTN3A3    | DAPK1    | FBXO34  | ICA1L    | LURAP1L | NOTCH4  | PRDM15  | SERPINB11 | TMEM200B |
| ABL2      | C10ORF118 | DAXX     | FBXO38  | ID1      | MAGEE2  | NPDC1   | PRDM7   | SESN2     | TMEM203  |
| ACACB     | C10ORF2   | DCDC5    | FBXW7   | ID2      | MAGI2   | NPHS1   | PRIC285 | SET       | TNRC6B   |
| ADAMTSL3  | C16ORF90  | DCHS2    | FCGBP   | ID3      | MAML1   | NPM1    | PROKR1  | SETD1B    | TNRC6C   |
| ADCYAP1R1 | C1ORF101  | DDI2     | FCN3    | IDH1     | MAP3K4  | NR1H4   | PRSS16  | SF1       | TOP1     |
| ADH1A     | C1ORF104  | DDX10    | FHIT    | IDH2     | MAP4K2  | NRAS    | PRSS3   | SF3A1     | TOP3B    |
| ADORA1    | C1QTNF7   | DDX41    | FLT3    | IDH3B    | MATN4   | NSD1    | PRUNE2  | SF3B1     | TPH2     |
| ADSSL1    | C22ORF31  | DEK      | FN1     | IDO2     | MC5R    | NSDHL   | PSD     | SF3B2     | TPSB2    |
| AF15Q14   | C8ORF80   | DHX15    | FNBP1   | IGF2BP3  | METTL13 | NSMCE1  | PSIP2   | SGK2      | TRIO     |
| AGBL5     | CACNA1E   | DHX34    | FREM2   | IL10RA   | MGA     | NUP214  | PSMD3   | SGK3      | TRIP11   |
| AHCTF1    | CASP1     | DIRC2    | FRG1B   | IL7R     | MKL1    | NUP98   | PTEN    | SHANK1    | TRPV2    |
| AHNAK2    | CBFA2T1   | DIS3     | FRG2C   | INO80    | MLF1    | OBSL1   | PTPN1   | SHROOM2   | TTK      |
| AKAP12    | CBFA2T3   | DNAH9    | GAS7    | INSC     | MLL     | ODZ2    | PTPN11  | SIK3      | TTN      |
| ALAD      | CBFB      | DNAJB6   | GAS8    | IQSEC3   | MLL2    | OR14J1  | PTPN13  | SLA       | U2AF1    |
| ALDH5A1   | CBL       | DNAJC12  | GATA1   | ISM1     | MLL3    | OR1A2   | PTPRB   | SLC22A12  | U2AF2    |
| AMAC1L1   | CBLB      | DNMT1    | GATA2   | ISX      | MN1     | OR2T4   | PUF60   | SLC25A19  | UBASH3A  |
| ANKFN1    | CBLC      | DNMT3A   | GATA3   | ITPR1    | MPEG1   | OR8K3   | PWWP2B  | SLC34A1   | UBE2O    |
| ANKMY1    | CCDC13    | DOT1L    | GBP4    | JAK1     | MPL     | P2RX1   | PXK     | SLC6A9    | USH2A    |
| ANKRD20A4 | CCDC83    | DSCAM    | GBP7    | JAK2     | MPRIP   | P2RY2   | PXN     | SLC7A8    | USP20    |
| ANKRD24   | CCR9      | DSPP     | GIGYF2  | JAK3     | MSF     | PAM16   | PYGO2   | SLC9A2    | USP31    |
| ANKS4B    | CDH13     | DYNC112  | GLTSCR1 | JMJD5    | MSH4    | PAQR6   | QRSL1   | SLFN11    | USP6     |
| APC       | CDH18     | DYSF     | GMPS    | KCNG1    | MSH6    | PAQR9   | RAD21   | SMC1A     | VCAN     |
| APOB      | CDH8      | ECSIT    | GNAS    | KCNH6    | MST1P9  | PCDHA1  | RAPGEF2 | SMC3      | VCPIP1   |
| AR        | CDT1      | EED      | GPAM    | KCNH7    | MST1R   | PCDHGA1 | RBM15   | SMG1      | VPS13C   |
| ARHGAP6   | CDX2      | EFCAB5   | GPBAR1  | KDM5A    | MT-CO2  | PCDHGA2 | RBM42   | SMPDL3B   | WAC      |
| ARHGEF12  | CEBP      | EGFR     | GPHA2   | KDM5C    | MT-CYB  | PCDHGA3 | RBMX    | SNX12     | WDR33    |
| ARHGEF3   | CEBPA     | EIF2S3   | GPR139  | KDM6A    | MTIF2   | PCDHGA4 | RELN    | SNX8      | WDR65    |
| ARID2     | CELSR3    | EIF4A1   | GPR156  | KDM6B    | MT-ND1  | PCDHGA5 | RET     | SPDYE6    | WDR87    |
| ARID5A    | CHD4      | ELF4     | GRAF    | KIAA0090 | MT-ND5  | PCDHGB1 | RGN     | SPPL2C    | WFDC12   |
| ARNT      | CHD9      | EMID1    | GRIA2   | KIAA0240 | MUC12   | PCDHGB2 | RILP    | SRCAP     | WHSC1L1  |
| ASAH2B    | CHIC2     | EML5     | GRIA4   | KIF26A   | MUC16   | PCSK2   | RIMS2   | SRGAP2    | WT1      |
| ASB2      | CHIT1     | EP300    | GRK7    | KIF26B   | MUC4    | PDGFR   | RNF213  | SRMS      | XIRP2    |
| ASGR1     | CHRNA5    | EPHB1    | GRM8    | KIF7     | MUC5AC  | PDZD2   | RNF24   | SRSF2     | XKR4     |
| ASTN2     | CLMN      | EPM2AIP1 | GRXCR1  | KIT      | MUC5B   | PEG10   | RP1L1   | SSH3BP1   | XPO7     |
| ASXL1     | CLTC      | EPOR     | GRXCR2  | KLHL7    | MUC6    | PER1    | RPL22   | STAG2     | YLPM1    |
| ASXL2     | CNGA4     | ETV6     | GYG1    | KRAS     | MYBPHL  | PHF6    | RPN1    | STEAP4    | YOD1     |
| ASXL3     | CNTNAP4   | EVI1     | HEAB    | LAMA1    | MYH11   | PHIP    | RPS6KA5 | STK40     | YTHDC1   |
| ATP2A2    | CPEB3     | EVPLL    | HELZ    | LAMA3    | MYO1D   | PHTF1   | RTL1    | SUPT5H    | ZBTB7A   |
| ATP2B2    | CREBBP    | EXOC6    | HERC2   | LASP1    | MYST4   | PIK3CA  | RTN1    | SUSD2     | ZDHHC5   |
| ATP2B3    | CRHR1     | EZH2     | HLXB9   | LAT      | NAP1L2  | PIK3R6  | RUNX1   | SUV39H2   | ZFHX4    |
| ATRX      | CRLF2     | FACL6    | HMCN1   | LCX      | NAV1    | PKD1L2  | RUNXBP2 | SUV420H1  | ZNF16    |
| ATXN3     | CRNN      | FAM123C  | HOXA13  | LDB3     | NCOA2   | PKHD1   | RUSC1   | SUZ12     | ZNF195   |
| AZI1      | CSF3      | FAM135B  | HOXA9   | LEF1     | NCOA3   | PML     | RXFP3   | SYNGAP1   | ZNF275   |
| BAT2      | CSMD1     | FAM166A  | HOXC11  | LGALS9   | NECAB2  | PMX1    | RYR3    | TCHH      | ZNF416   |
| BAT2L2    | CSRNP2    | FAM57B   | HOXC13  | LILRA2   | NF1     | PNUTL1  | SAMHD1  | TECR      | ZNF479   |
| BAZ2B     | CT62      | FAM5C    | HOXD11  | LILRA6   | NFE2    | POLD1   | SCAMP3  | TESK1     | ZNF609   |
| BCORL1    | CTCF      | FAM65A   | HOXD13  | LOC64366 | NFIB    | POLG    | SCAMP5  | TET1      | ZNF79    |
| BMP7      | CTNNA2    | FAM65B   | HP      | LPHN3    | NFIX    | POLL    | SCN9A   | TET2      | ZNF80    |
| BPGM      | CWC22     | FAT1     | HRCT1   | LRIT3    | NFKBIZ  | POTEE   | SCUBE1  | TET3      | ZNF814   |
| BRAT1     | CXADR     | FAT2     | HS6ST1  | LRP1B    | NLGN3   | POU2F2  | SEC14L3 | TG        | ZNF831   |
| BRCA1     | CXORF57   | FAT3     | HTRA1   | LRP2     | NOTCH1  | POU2F3  | SEC22B  | THG1L     | ZRSR2    |
| BRD8      | CYP4A11   | FAT4     | HYAL1   | LRR1Q4   | NOTCH2  | POU4F2  | SEMA4G  | TIE1      | ZXDC     |

**Supplementary Table S2: Antibodies used for flow cytometric analysis**

| <b>Name</b>    | <b>Fluorochrome</b> | <b>Catalog Number</b> | <b>Clone</b> | <b>Supplier</b>  |
|----------------|---------------------|-----------------------|--------------|------------------|
| CD117          | APC                 | 17-1171-83            | 2B8          | EbioScience      |
| CD117          | APC-eFluo780        | 47-1171-82            | 2B8          | EbioScience      |
| CD11b          | PE-Cy7              | 25-0112-82            | M1/70        | EbioScience      |
| CD11b          | FITC                | 11-0112-82            | M1/70        | EbioScience      |
| CD127          | AlexaFluor488       | 53-1271-82            | A7R34        | EbioScience      |
| CD135          | PE                  | 12-1351-83            | A2F10        | EbioScience      |
| CD16/CD32      | Biotin              | 45-0161-82            | 93           | EbioScience      |
| CD19           | PE-Cy7              | 25-0193-82            | eBio1D3      | EbioScience      |
| CD24           | APC-eFluo780        | 47-0242-82            | M1/69        | EbioScience      |
| CD25           | AlexaFluor488       | 53-0251-82            | PC61.5       | EbioScience      |
| CD34           | FITC                | 11-0341-82            | RAM34        | EbioScience      |
| CD3e           | PE-Cy7              | 25-0031-82            | 145-2C11     | EbioScience      |
| CD3e           | APC                 | 17-0031-83            | 145-2C11     | EbioScience      |
| CD4            | APC-eFluo780        | 47-0041-82            | GK1.5        | EbioScience      |
| CD43           | FITC                | 561856                | S7           | BDBioScience     |
| CD44           | PE-Cy7              | 25-0441-82            | IM7          | EbioScience      |
| CD45.1         | APC-eFluo780        | 47-0453-82            | A20          | EbioScience      |
| CD45.2         | FITC                | 11-0454-82            | Co4          | EbioScience      |
| CD45R (B220)   | PE-Cy7              | 25-0452-82            | RA3-6B2      | EbioScience      |
| CD71           | APC                 | 17-0711-82            | R17217       | EbioScience      |
| CD8a           | PE                  | 12-0081-83            | 53-6.7       | EbioScience      |
| F4/80          | APC                 | 17-4801-82            | BM8          | EbioScience      |
| IgM            | APC                 | 1020-118              |              | Southern Biotech |
| Ly-51          | PE                  | 553735                | BP-1         | BDBioScience     |
| Ly6A/E (Sca-1) | PerCP-Cy5.5         | 45-5981-82            | P7           | EbioScience      |
| Ly6G (Gr-1)    | PE-Cy7              | 25-5931-82            | RB6-8C5      | EbioScience      |
| Ly-6G (Gr-1)   | PE                  | 12-5931-83            | RB6-8C5      | EbioScience      |
| TER-119        | PE-Cy7              | 25-5921-82            | TER-119      | EbioScience      |
