# Supplementary material for: ASXL2 regulates hematopoiesis in mice and its deficiency promotes myeloid expansion
Source: PubMed Central journal article supplement — Haematologica. 2018 Aug 9;103(12):1980–90. doi: 10.3324/haematol.2018.189928 (PMC6269306; doi:10.3324/haematol.2018.189928), 2018-12
Supplement: 2018_189928-Disclosures_and_Contributions.pdf [file 2018_189928-Disclosures_and_Contributions.pdf]

Haematologica  
HAEMATOL/2018/189928  
Version 4

ASXL2 regulates hematopoiesis in mice and its deficiency promotes  
myeloid expansion

Vikas Madan, Lin Han, Norimichi Hattori, Weoi Woon Teoh, Anand  
Mayakonda, Qiao-Yang Sun, Ling-Wen Ding, Hazimah Binte Mohd  
Nordin, Su Lin Lim, Pavithra Shyamsunder, Pushkar Dakle, Janani  
Sundaresan, Ngan B. Doan, Masashi Sanada, Aiko Sato-Otsubo,  
Manja Meggendorfer, Henry Yang, Jonathan W. Said, Seishi Ogawa,  
Torsten Haferlach, Der-Cherng Liang, Lee-Yung Shih, Tsuyoshi  
Nakamaki, Q. Tian Wang, and H. Phillip Koeffler

Disclosures: Dr. Haferlach declares part ownership of MLL Munich Leukemia Laboratory. Dr. Meggendorfer is an employee of MLL Munich Leukemia Laboratory. The remaining authors declare no competing financial interests.

Contributions: V.M. conceived the study, designed and performed research, analyzed data and wrote the manuscript; L.H. and T.W.W. designed and performed research and analyzed data; N.H. conceived the study, provided patient samples and clinical data, performed sequencing and analyzed data; A.M. performed bioinformatics and statistical analyses and wrote the manuscript; Q-Y.S., L-W.D., L.S.L., P.S., J.S. performed sequencing and other experiments; H.B.M.N. maintained mouse colonies and performed genotyping; N.B.D. and J.W.S. performed histological analysis; P.D., M.S., A.S-O. and H.Y. analyzed sequencing data; S.O. supervised bioinformatics analysis; M.M., T.H., D-C.L. and T.N. collected and processed patient samples and provided clinical data; L-Y.S. designed the study, collected and processed patient samples and provided clinical data; Q.T.W. provided the mouse colony; H.P.K. conceived and supervised the study, interpreted the data and wrote the manuscript. All authors reviewed and approved the manuscript.
